# Supplementary material for: Mental Health and Health-related Quality of Life in German Adolescents After the Third Wave of the COVID-19 Pandemic
Source: Research Square preprint supplement (doi:10.21203/rs.3.rs-1327459/v1), 2022-02-09
Supplement: Supplementary file 1 [file eeddadfda08139ce74734a82.docx]

**Supplement A:** S Self-reported HRQoL and psychological symptoms in different sex groups

|  | **Girls** | **Boys** | **Diverse** |
| --- | --- | --- | --- |
|  | *n=695* | *n=674* | *n=13* |
| **HRQoLa** |  |  |  |
| General HRQoL index, mean T values (SD) | 51.5 (10.70) | 56.2 (11.22) | 42.2 (7.85) |
| **SDQb,** mean scores (SD) |  |  |  |
| *Emotional problems* | *3.8 (2.63)* | *2.2 (1.96)* | *6.2 (2.56)* |
| *Conduct problems* | *1.8 (1.56)* | *1.6 (1.50)* | *2.5 (1.57)* |
| *Hyperactivity* | *3.4 (2.22)* | *3.4 (2.21)* | *4.0 (2.45)* |
| *Peer problems* | *2.5 (1.85)* | *2.2 (1.80)* | *2.7 (1.56)* |
| *Prosocial behavior* | *8.4 (1.79)* | *8.1 (1.78)* | *7.0 (2.17)* |
| *Externalizing score* | *5.2 (3.25)* | *5.0 (3.13)* | *6.5 (3.03)* |
| *Internalizing score* | *6.3 (3.73)* | *4.4 (3.15)* | *8.9 (3.42)* |
| *Total Score* | *11.5 (5.80)* | *9.4 (5.20)* | *14.8 (6.21)* |

a 10-item General HRQoL index assessed by the KIDSCREEN-10

b Strengths and Difficulties Questionnaire
